# Supplementary material
Source: publisher site journal article supplement (https://www.dovepress.com/get_supplementary_file.php?f=327594.docx)
Supplement: Supplementary file 1 [file get_supplementary_file.php]

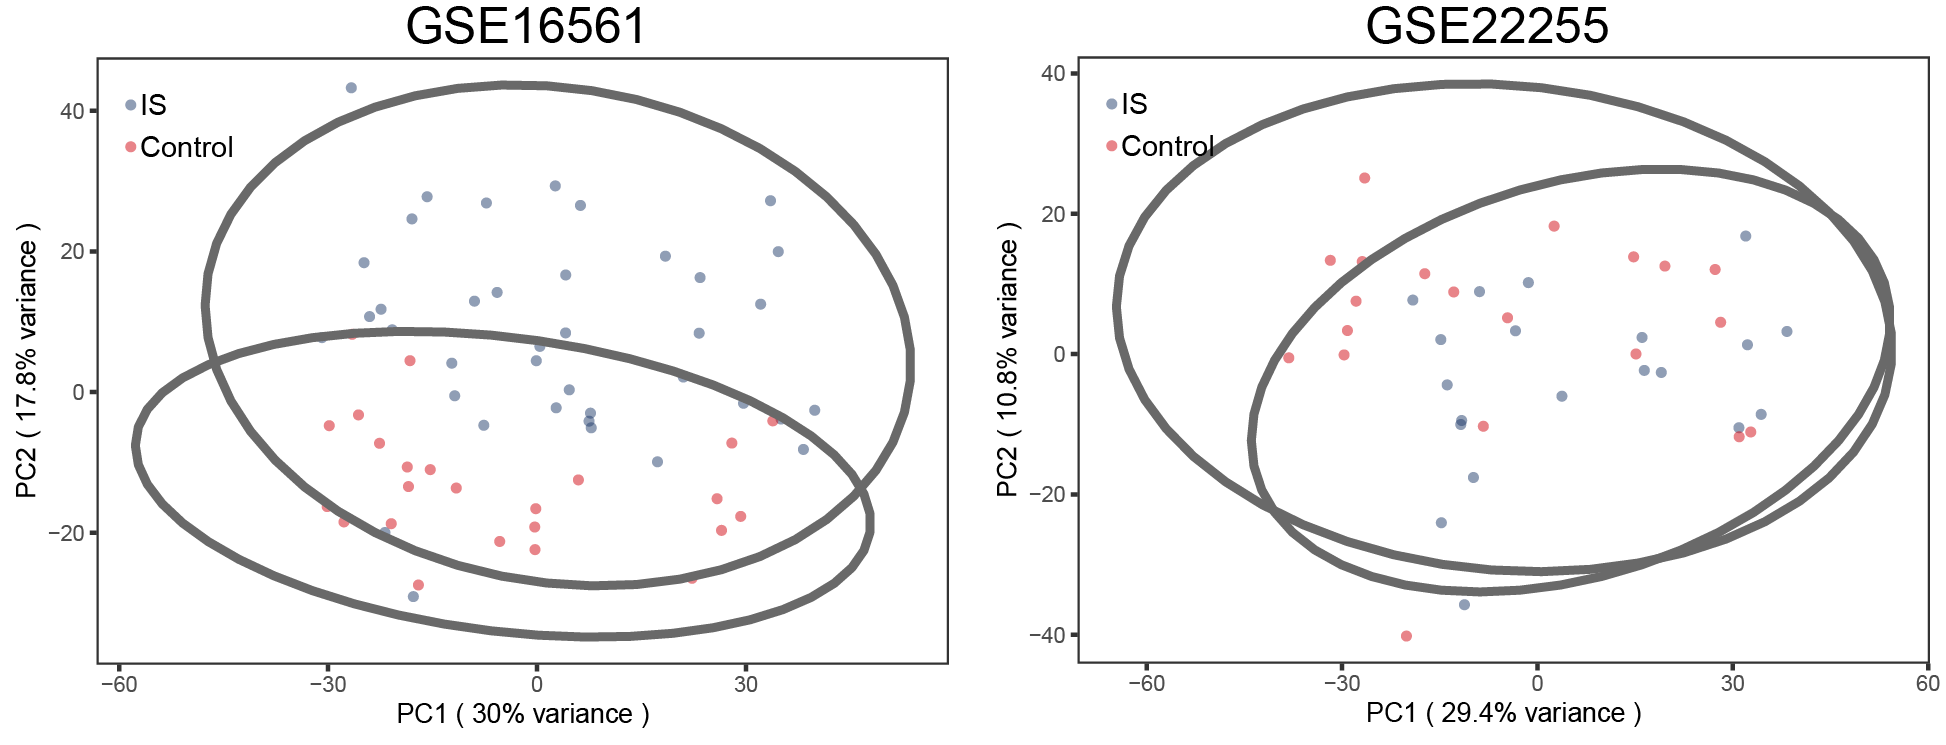


**Supplementary Figure S1.** Principal component analysis of ischemic stroke (IS) samples and control samples in the GSE16561 and GSE22255 datasets. PC, principal component.
